# Supplementary material
Source: publisher site journal article supplement (https://www.degruyterbrill.com/publication/dbid/dtlo/downloadAsset/DTLO_DTLO_Vorwort.pdf)
Supplement: Supplementary file 1 [file DTLO_DTLO_Vorwort.pdf]

## Vorwort zum Deutschen Theater- Lexikon Online

aus „Wilhelm Kosch:  
Deutsches Theater-Lexikon –  
Biographisches und Bibliographisches  
Handbuch – Erster Band.  
Verlag Ferd. Kleinmayr Klagenfurt und  
Wien, 1953, ISBN 978-3-11-095434-0“

Ein Lexikon des deutschsprachigen Theaters, seiner namhaften Schauspieler, Sänger, Spielleiter, seiner hervorragendsten Schöpfungen, Dramatiker und Komponisten, seiner wichtigsten Standorte, seiner geschichtlichen Entwicklung, seiner Zeitschriften usw. gibt es bis heute nicht. Das angekündigte Werk bedeutet einen ersten Versuch, diese Lücke auszufüllen. Obwohl es nicht einmal an den Hauptstätten des Bühnenlebens Archive gibt und die Theaterwissenschaft erst in ihren Anfängen steckt, mußte der Versuch gewagt werden.

Die Schwierigkeiten waren deshalb besonders groß, weil z. B. die Daten, vor allem die Geburtsdaten von vielen Darstellern, entweder überhaupt nicht festgestellt werden konnten oder aber die Angaben, häufig unkontrollierbare, selbst in gedruckten Quellen, schwankten. Überdies erwies sich die Zuverlässigkeit aller bisherigen Nachschlagewerke und periodischen Organe dieser Art als mehr oder minder problematisch. Zahlreiche Fragebogen blieben unbeantwortet. Nachforschungen bei zuständigen Behörden in Orten, die zu nicht mehr deutschen Gebieten gehören, mußten von vornherein als aussichtslos betrachtet werden.

Wenn ich mich trotzdem entschloß, eine fast unerfüllbare Aufgabe zu übernehmen, so tat ich es im festen Glauben, daß jetzt vielleicht noch manches festzustellen ist, was später überhaupt unerreichbar sein würde. Für jeden Hinweis, für jede Ergänzung, für jede Verbesserung bin ich dankbar.

Das „Deutsche Theater-Lexikon“ will Auskunft geben nicht nur über die Elemente, die in ihrer Gesamtheit den Begriff der Bühne bilden, sondern vielmehr über Leben und Wirken der darstellenden Künstler, Dramatiker und Komponisten, Kritiker, Forscher, über Meisterwerke des Spielplanes, über stoffliche Motive, über wichtige Theaterstädte und ihre Organe. Ausführliche Literaturverzeichnisse ergänzen den Haupttext. Auf möglichst vollständige Erfassung des erreichbaren bio- und bibliographischen Materials wird das Hauptgewicht gelegt. Dabei jedoch sollen subjektive Wertungen unterbleiben. Jede Parteinahme würde der erstrebten wissenschaftlichen Objektivität nur Eintrag tun. Stets jedoch erscheint der internationale Zusammenhang der heimischen Bühne mit dem Theater anderer Völker gewahrt, so daß es für die gesamte Bühnenwelt, für alle Fachleute und Theaterliebhaber des In- und Auslandes als unentbehrliches Nachschlagewerk in Betracht kommt.

Von Dichtern und Komponisten werden ausschließlich ihre Bühnenwerke und Schriften zur Theaterliteratur angeführt, wohl aber gelangen wichtige Gedenkartikel aus der Tagespresse zur Aufnahme. Im übrigen sind die Grundsätze, denen ich bei Abfassung des „Deutschen Theaters-Lexikons“ folge, die gleichen, die mich bei Herausgabe des „Deutschen Literaturs-Lexikons“ geleitet haben.

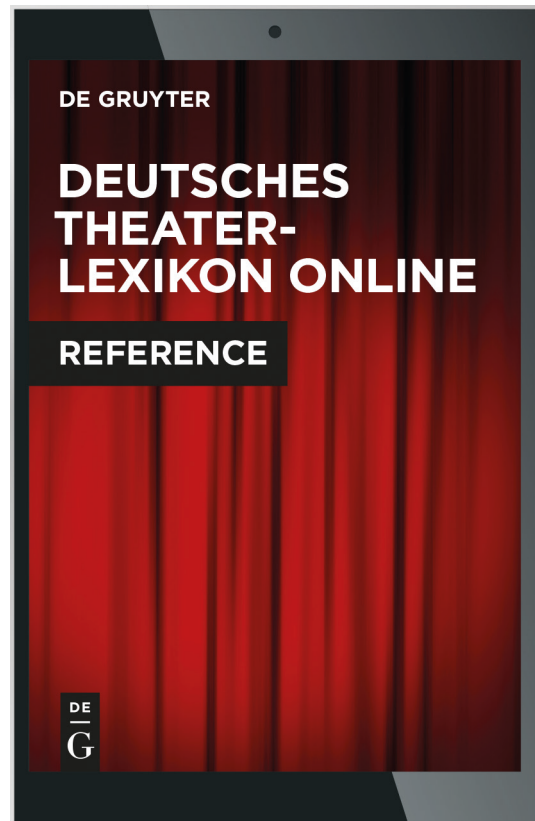

„Dem Mimen flicht die Nachwelt keine Kränze“, heißt es bei Schiller. Doch die Theaterwissenschaft weiß, was sie auch jenem schuldet, und legt nun diesen Kranz an seinem Denkmal nieder. „Denn wer den Besten seiner Zeit genug getan, der hat gelebt für alle Zeiten“, sagt Schiller weiter.

Mögen die folgenden Blätter von der Dankbarkeit unserer Generation Zeugnis ablegen helfen.

Die mühselige und leider oft unfruchtbare Forschungsarbeit, die mit der Erstausgabe eines Lexikons verbunden ist, kann nur von Lexikographen selbst richtig beurteilt werden. In der Regel hört man mehr von Kritikern als von Helfern. Umsomehr fühlt man sich daher denjenigen verpflichtet, die, sei es nur ab und zu, wirkliche Auskünfte zu erteilen in der Lage sind und ihre Hilfsbereitschaft in die Tat umsetzen. So danke ich für einzelne Hinweise und Ergänzungen den folgenden Persönlichkeiten: Dr. Otto Demuth (Schongau), Dr. Margaret Dietrich (Wien), Dr. Kurt Gassen (Berlin), Dr. Karl Gladt (Wien), Professor Dr. Joseph Gregor (Wien), Dr. Franz Hadamowsky (Wien), Edith Kleinmayr (Klagenfurt), Prof. Dr. Hugo Kleinmayr (Graz), Dr. Max Leyrer (Wien), Dr. Cola Minis (Rotterdam), Dr. Albert Mittringer (Wien), Bertha Niederle (Wien), Karl Ranninger (Wien), Wilhelm Schmidt (Wien), Dr. Günther Schöne (München), Dr. Robert Teichl (Wien), Dr. Fritz Tutenberg (Berlin), Dr. Ferdinand Wernigg (Wien), Dr. Joseph Weyden (Maastricht), Stefan Zadejan (Linz an der Donau) und schließlich meinem Sohn Dr. Wilhelm Kosch (Graz). Besonders verpflichtet bin ich jedoch dem ausgezeichneten Kenner altösterreichischer Kultur Gustav Gugitz (Wien) und dem rastlosen Sammler und theaterkundlichen Lokalhistoriker Hans Wagner (München), der sein Archiv selbstlos mir erschlossen hat. Der Dank an den hochherzigen, zu erheblichen Opfern bereiten Verleger Walter Kleinmayr erreicht diesen leider nicht mehr unter den Lebenden, wohl aber der an seine vorbildlich sorgende Gattin, die der Ausführung meines Planes die ersten Wege geebnet hat.

Die österreichische Nationalbibliothek (Theater- und Musikabteilung), das Institut für Theaterwissenschaft der Universität, die Stadtbibliothek, die Universitätsbibliothek und die Österreichische Bühnengewerkschaft in Wien sind mir in liberalster Weise zur Verfügung gestanden. Verlagssekretärin Franziska Schreitl hat sich durch das Herbeischaffen von Material um das Gesamtwerk unermüdlich bemüht. Meiner wie immer auch diesmal hilfreichen Privatsekretärin Hermine Nohr verdanke ich die Reinschrift des Ganzen.

Wien, im Sommer 1953.

Wilhelm K o s c h
